# Supplementary material for: A Social Media Organizational Productivity Model: Insights From Public Health Professionals
Source: J Med Internet Res. 2021 May 5;23(5):e23792. doi: 10.2196/23792 (PMC8135021; doi:10.2196/23792)
Supplement: Multimedia Appendix 2 [file jmir_v23i5e23792_app2.docx]

## Appendix 2: Demographic information of nurses

| No. of interviewees | Designations | Age (Years) | Experience (Years) |
| --- | --- | --- | --- |
| Int1 | Nurse | 27 | 3 |
| Int2 | Head nurse | 35 | 7 |
| Int3 | Nurse | 29 | 2 |
| Int4 | Nurse | 26 | 2 |
| Int5 | Head nurse | 37 | 8 |
| Int6 | Nurse | 28 | 2 |
| Int7 | Nurse | 29 | 3 |
| Int8 | Head nurse | 31 | 5 |
| Int9 | Nurse | 33 | 7 |
| Int10 | Nurse | 26 | 2 |
| Int11 | Nurse | 29 | 3 |
| Int12 | Nurse | 41 | 9 |
| Int13 | Head nurse | 28 | 2 |
| Int14 | Head nurse | 30 | 4 |
| Int15 | Nurse | 32 | 6 |
| Int16 | Nurse | 29 | 4 |
| Int17 | Nurse | 38 | 9 |
| Int 18 | Head nurse | 41 | 13 |
| Int19 | Nurse | 32 | 4 |
| Int20 | Nurse | 31 | 3 |
| Int21 | Nurse | 26 | 2 |
| Int22 | Head nurse | 29 | 3 |
| Int23 | Nurse | 35 | 5 |
| Int24 | Nurse | 28 | 2 |
| Int25 | Nurse | 31 | 4 |
| Int26 | Head nurse | 35 | 7 |
| Int27 | Nurse | 29 | 2 |
| Int28 | Nurse | 26 | 2 |
| Int29 | Head nurse | 37 | 7 |
| Int30 | Nurse | 28 | 3 |
